# Supplementary material for: External morphology of eyes and Nebenaugen of caridean decapods–ecological and systematic considerations
Source: PeerJ journal article supplement (doi:10.7717/peerj.1176), 2015-08-18

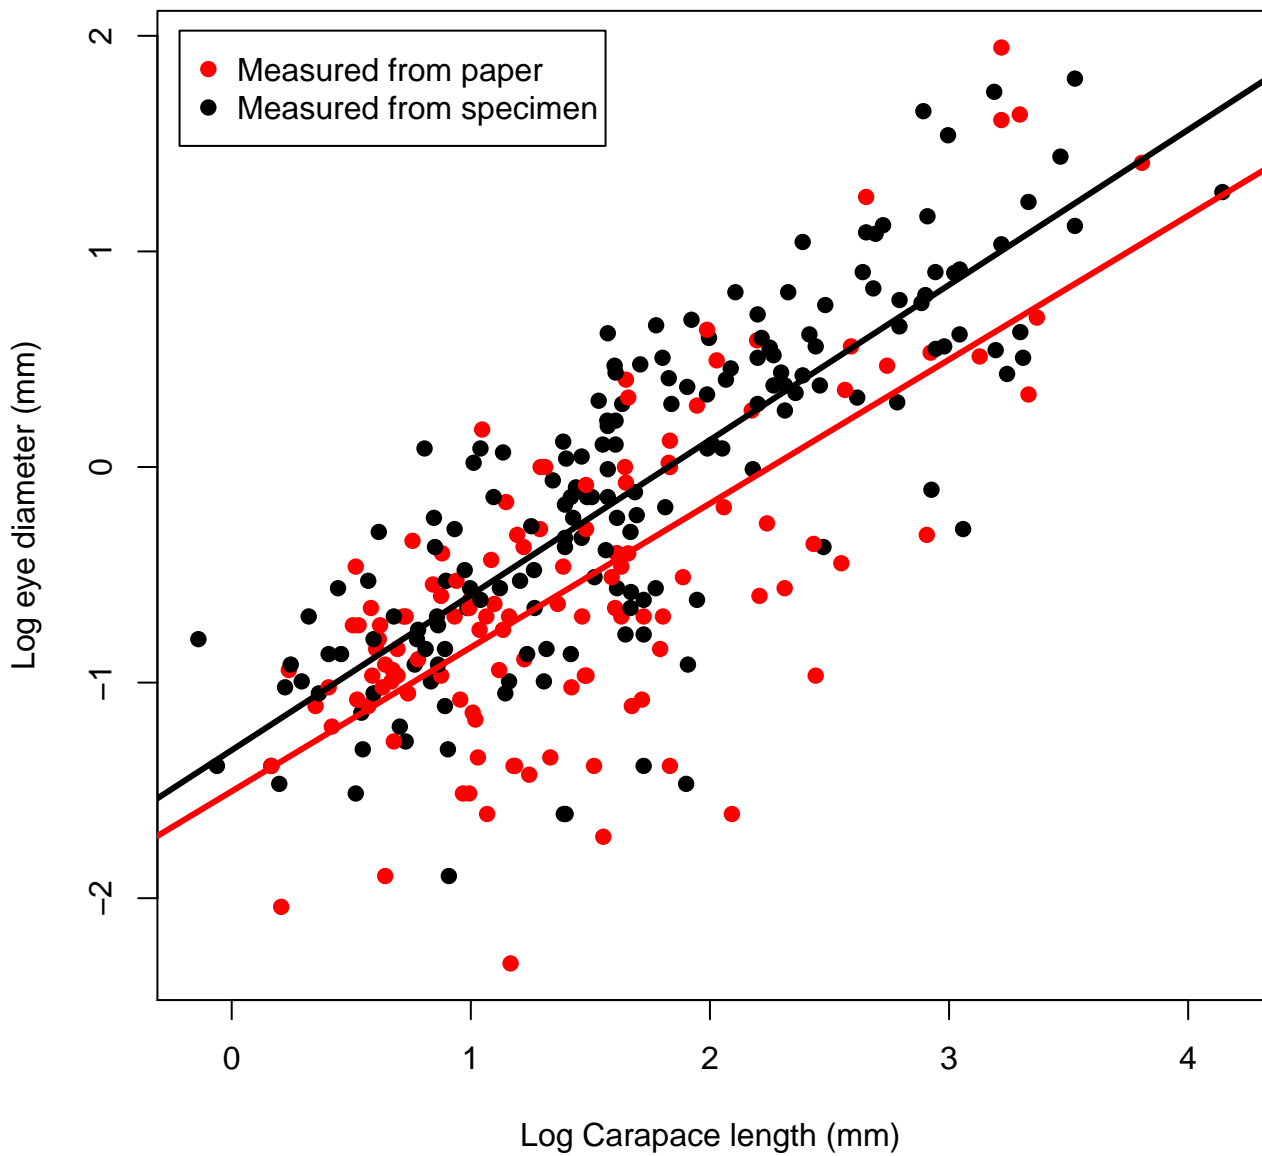

Supplement: Supplemental_fig_1.pdf [file Supplemental_fig_1.pdf]
